# Supplementary material for: Different Responses to Drug Safety Screening Targets between Human Neonatal and Infantile Heart Tissue and Cardiac Bodies Derived from Human-Induced Pluripotent Stem Cells
Source: PubMed Central journal article supplement (PMC6431377; doi:10.1155/2019/6096294), 2019-03-06
Supplement: 6096294.f1.pdf [file 6096294.f1.pdf]

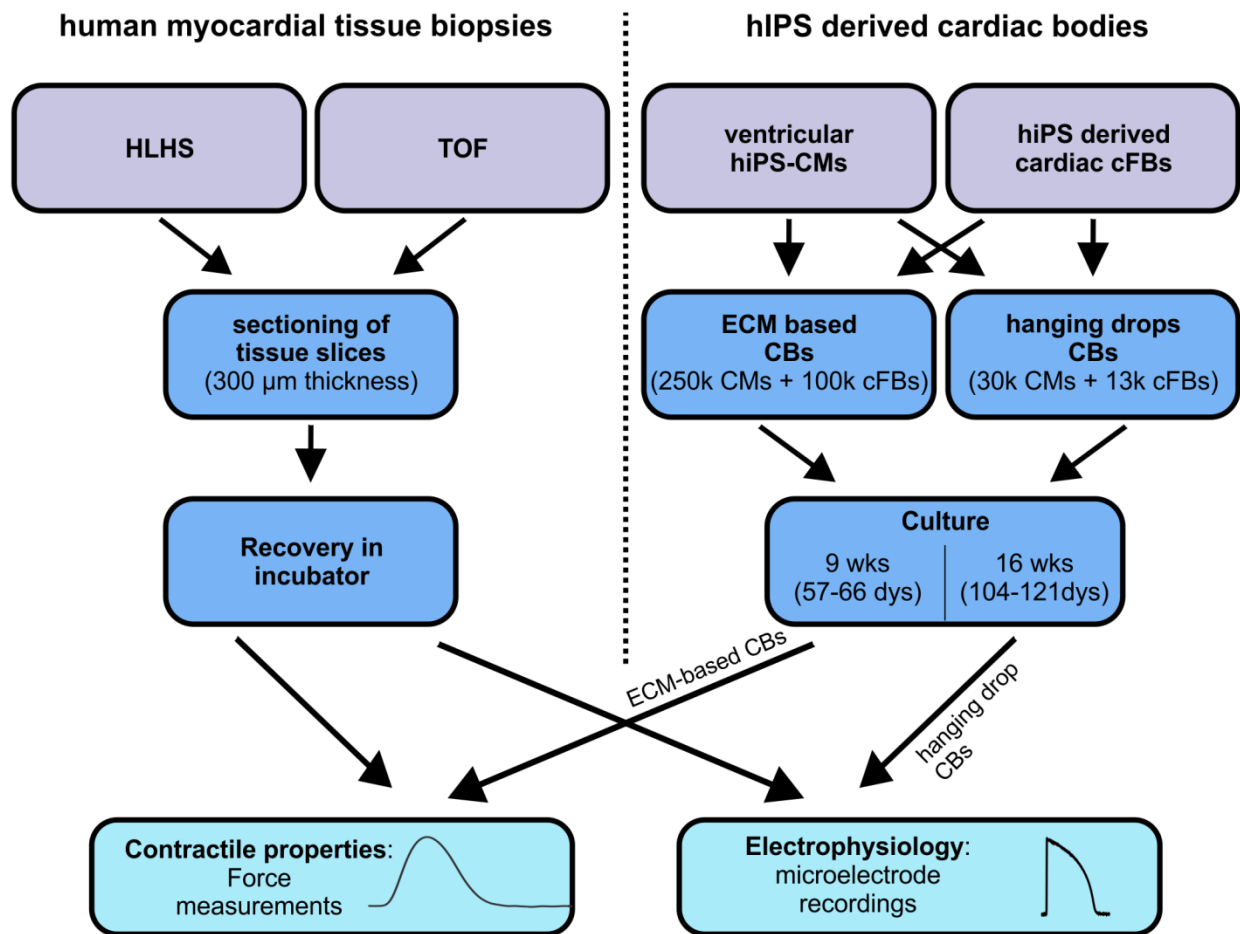

**Supplemental Fig 1: Experimental overview.** Human myocardial tissue biopsies from HLHS and TOF patients are sectioned before electrophysiological recordings and force measurements on the same day. Cardiac bodies (CBs) were produced from hiPS derived ventricular cardiomyocytes and cardiac fibroblasts and cultured until experiments. Microelectrode recordings were performed with CBs formed by hanging drop method, while force measurements were carried out with CBs produced by an extracellular matrix (ECM) based approach.

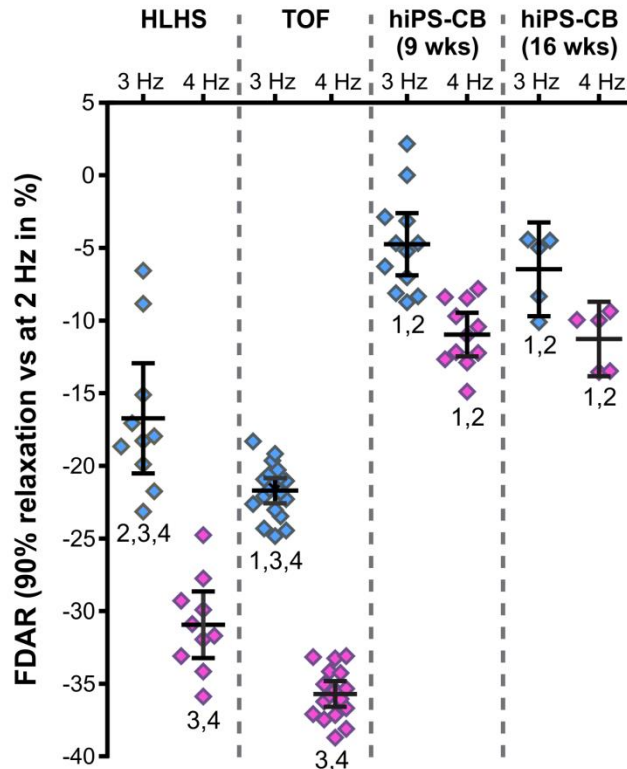

**Supplemental Fig 2: Frequency-dependent acceleration of relaxation (FDAR).** All groups show FDAR at a stimulation frequency of 3 Hz and 4 Hz as indicated by the reduction in time to 90% relaxation relative to contractions at 2 Hz of individual experiments (HLHS, n = 10 of 6 patients; TOF, n = 19 of 8 patients; 9 wks hiPS-CBs, n = 12; 16 wks hiPS-CBs, n = 5). Lines and error bars represent mean  $\pm$  95% CIs, respectively. Numbers below error bars indicate p-values < 0.05 vs. HLHS (1), TOF (2), 9 wks hiPS-CBs (3), and 16 wks hiPS-CBs (4). 3Hz: ANOVA,  $p=5.99 \times 10^{-28}$ ; Games Howell Post-Hoc: HLHS vs. TOF:  $p = 0.004$ ; HLHS vs. hiPS-CBs 9 wks:  $p = 1.29 \times 10^{-10}$ ; HLHS vs. hiPS-CBs 16 wks:  $p = 4.04 \times 10^{-8}$ ; TOF vs. hiPS-CBs 9 wks:  $p = 1.07 \times 10^{-12}$ ; TOF vs. hiPS-CBs 16 wks:  $p = 2.20 \times 10^{-6}$ ; hiPS-CBs 9 wks vs. hiPS-CBs 16 wks:  $p = 0.994$ . 4Hz: ANOVA,  $p=1.39 \times 10^{-9}$ ; Games Howell Post-Hoc: HLHS vs. TOF:  $p = 0.065$ ; HLHS vs. hiPS-CBs 9 wks:  $p = 1.00 \times 10^{-4}$ ; HLHS vs. hiPS-CBs 16 wks:  $p = 1.15 \times 10^{-3}$ ; TOF vs. hiPS-CBs 9 wks:  $p = 3.99 \times 10^{-10}$ ; TOF vs. hiPS-CBs 16 wks:  $p = 2.24 \times 10^{-4}$ ; hiPS-CBs 9 wks vs. hiPS-CBs 16 wks:  $p = 0.676$ .

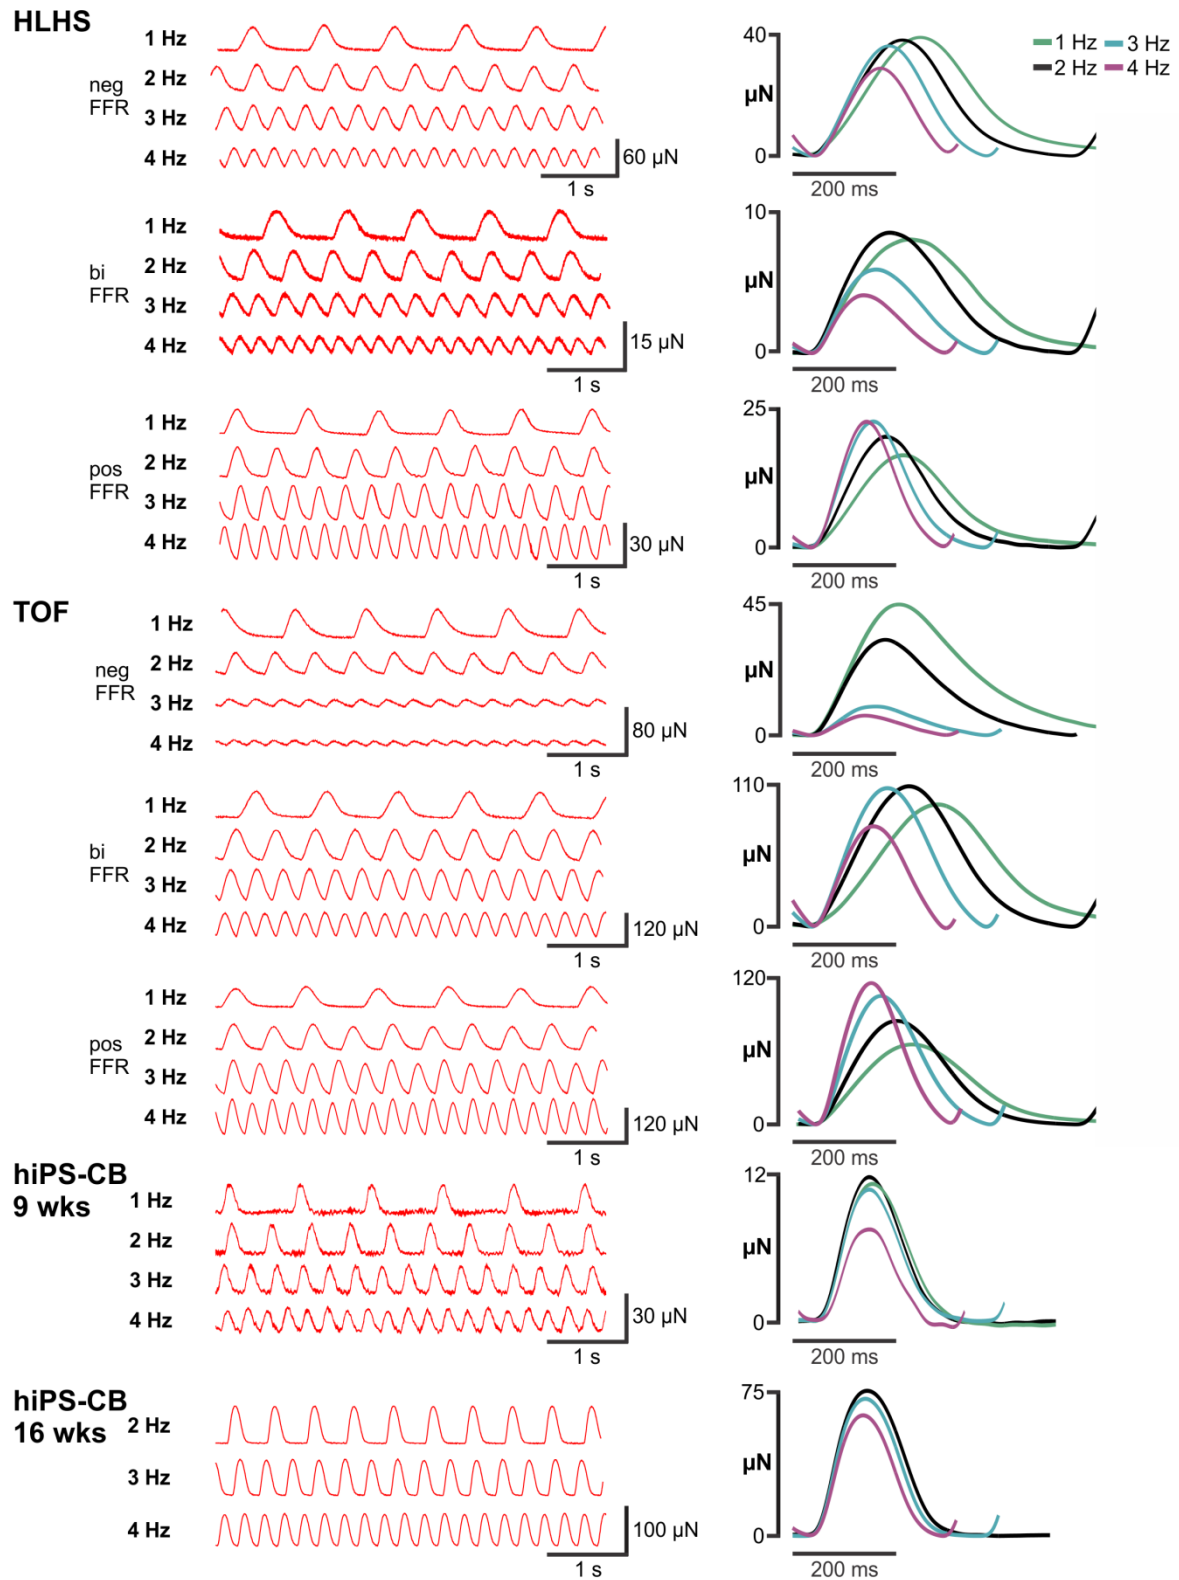

**Supplemental Fig 3: Representative experiments of force-frequency relationships (FFR) pattern.** For HLHS and TOF myocardial tissues slices, examples are shown for positive (HLHS6, TOF3), negative (HLHS6, TOF9) and bi-phasic FFRs (HLHS2, TOF4). Because hiPS-CBs did not exhibit diverse FFR patterns, only one representative experiment for 9 wks and 16 wks is depicted. The red traces on the left side show original recordings of

experiments at different stimulation frequencies (1,2,3,4 Hz) and the corresponding averaged twitches are superimposed in the right panels. Note that none of the 16 wks old hiPS-CBs could be stimulated at 1 Hz.

### HLHS

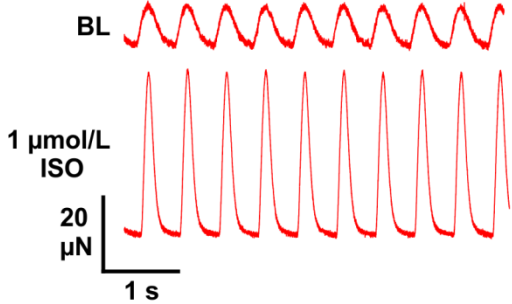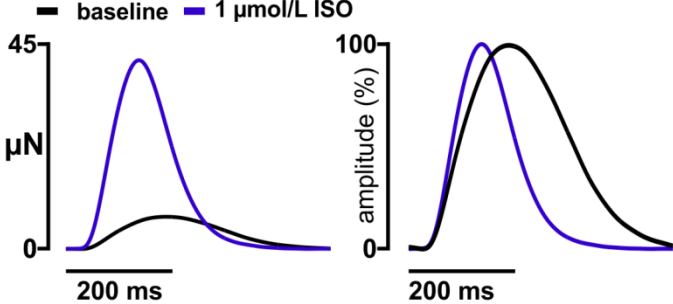

### TOF

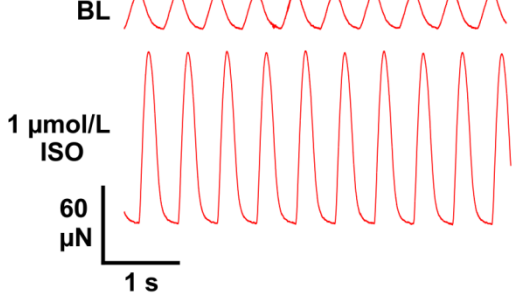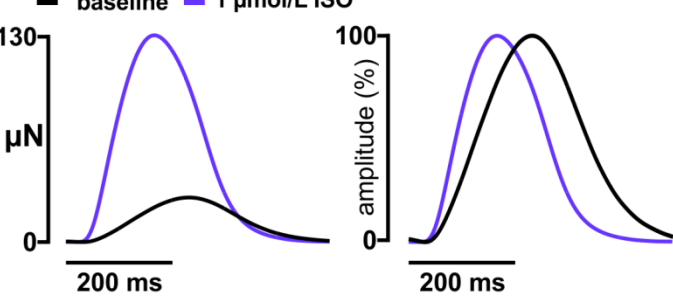

### hiPS-CB (9 wks)

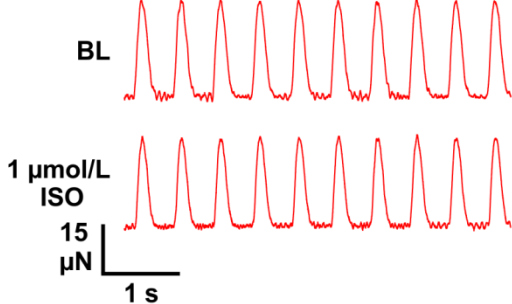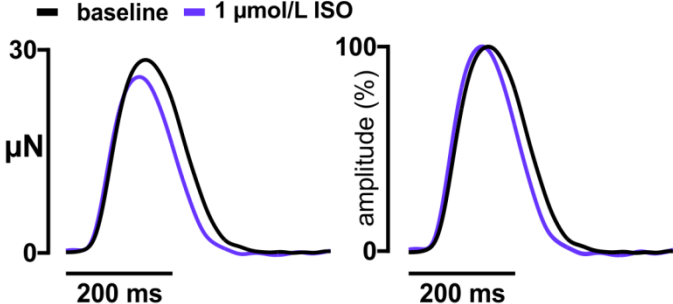

### hiPS-CB (16 wks)

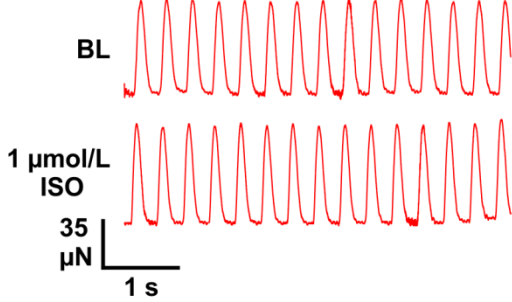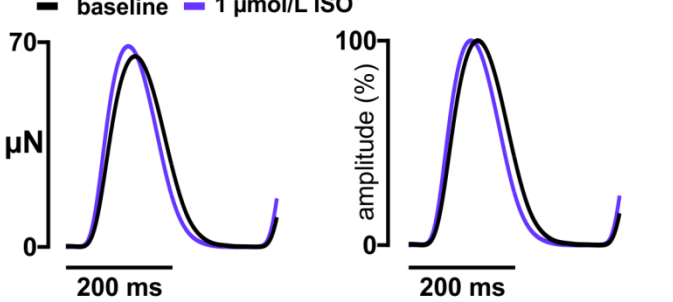

**Supplemental Fig 4: Representative experiments of  $\beta$ -adrenergic stimulation by isoproterenol.** Original traces (left panels), averaged twitches (middle panels) and amplitude-normalized averaged twitches (right panels) before and after application of 1  $\mu\text{mol/L}$  isoproterenol (ISO) for myocardial tissues slices from patients HLHS2 and TOF4 as well as hiPS-CBs (9 wks and 16 wks) are depicted. Lusitropic effect of  $\beta$ -adrenergic stimulations is highlighted by amplitude normalisation of the averaged twitches.

**Tables:**

**Table 1: Patients characteristics.**

| Patient ID | Age (days/months) | Birth weight (g) | Diagnosis <sup>2</sup> | Type of operation          | Drugs <sup>3</sup> | SpO <sub>2</sub> <sup>4</sup> | Experiments <sup>5</sup> |
|------------|-------------------|------------------|------------------------|----------------------------|--------------------|-------------------------------|--------------------------|
| HLHS1      | 36 / 1.2          | 3250             | HLHSMAS                | Norwood procedure          | M, D               | 99                            | FFR                      |
| HLHS2      | 15 / 0.5          | 2690             | HIAA+VSD               | Norwood procedure          | M, BB, F, S, D     | 90                            | MDA,E4031,FFR, ISO       |
| HLHS3      | 69 / 2.3          | 2100             | HLHS                   | Norwood procedure          | BB, ASA, D         | 70                            | MDA                      |
| HLHS4      | 12 / 0.4          | 3900             | HLHSMMA+TAPVR          | Norwood procedure          | M, Mil, D          | 95                            | MDA,E4031, FFR, ISO      |
| HLHS5      | 6 / 0.2           | 2570             | HLHSMMAA               | Norwood procedure          | M                  | 95                            | MDA, FFR, ISO            |
| HLHS6      | 7 / 0.2           | 2800             | HLHS                   | Norwood procedure          | M, BB, S, D        | 95                            | MDA, FFR, ISO            |
| HLHS7      | 2 / 0.1           | 2700             | HLHS+MS+AS             | Norwood procedure          | M, D               | 90                            | MDA, FFR, ISO            |
| TOF1       | 168 / 5.5         | 3950             | TOF+PDA                | TOF repair                 | BB                 | 91                            | MDA, FFR, ISO            |
| TOF2       | 170 / 5.6         | 3000             | TOF                    | TOF repair                 | Nil                | 99                            | MDA,E4031                |
| TOF3       | 198 / 6.5         | 3200             | TOF                    | TOF repair                 | Sot                | 100                           | MDA,E4031, FFR, ISO      |
| TOF4       | 164 / 5.4         | 3300             | TOF                    | TOF repair                 | A, S, BB, ASA      | 72                            | FFR, ISO                 |
| TOF5       | 210 / 6.9         | 3850             | PA+VSD                 | VSD closure, RV-PA-conduit | ASA, BB            | 80                            | MDA,E4031+ISO, FFR, ISO  |
| TOF6       | 178 / 5.8         | 1550             | TOF+PDA                | TOF repair, closure of PDA | BB                 | 65                            | MDA,E4031+ISO, FFR, ISO  |
| TOF7       | 129 / 4.2         | 3250             | TOF                    | TOF repair                 | Nil                | 99                            | MDA,E4031+ISO, FFR       |
| TOF8       | 155 / 5.1         | 3100             | TOF                    | TOF repair                 | Nil                | 98                            | FFR                      |
| TOF9       | 212 / 7.0         | 2650             | PA-VSD                 | VSD closure, RV-PA-conduit | ASA                | 75                            | MDA, FFR                 |
| TOF10      | 165 / 5.5         | 2900             | TOF                    | TOF repair                 | Nil                | 92                            | E4031                    |

1: M, male; F, female

2: AS, aortic stenosis; IAA, interrupted aortic arch; HLHS, hypoplastic left heart syndrome; PA, pulmonary atresia; PDA, patent ductus arteriosus; TAPVR, total anomalous pulmonary venous return; TOF, Tetralogy of Fallot; VSD, ventricular septal defect

3: A, ACE-inhibitor; ASA, acetylsalicylic acid; BB,  $\beta$ -blocker; D, dexamethasone; F, furosemide ; P, prostaglandin E2; Mil, milrinone; S, spironolactone ; Sot, sotalol

4: Oxyhemoglobin saturation by pulse oximetry

5: FFR, force-frequency-relationship; ISO, isoproterenol; MDA, rate-dependent action potential adaptation.

**Supplemental Table 1: AP characteristics.**

| frequency              | Hz | amplitude |                |                         | MDP   |                |                  | Vmax  |                |                         | APD 20 |                |                         | APD 50 |                |                         | APD 90 |                |                         |
|------------------------|----|-----------|----------------|-------------------------|-------|----------------|------------------|-------|----------------|-------------------------|--------|----------------|-------------------------|--------|----------------|-------------------------|--------|----------------|-------------------------|
|                        |    | mean      | 95% CI         | p-value vs. 2 Hz        | mean  | 95% CI         | p-value vs. 2 Hz | mean  | 95% CI         | p-value vs. 2 Hz        | mean   | 95% CI         | p-value vs. 2 Hz        | mean   | 95% CI         | p-value vs. 2 Hz        | mean   | 95% CI         | p-value vs. 2 Hz        |
| <b>HUHS</b>            |    |           |                |                         |       |                |                  |       |                |                         |        |                |                         |        |                |                         |        |                |                         |
| 1                      | 16 | 108.6     | [104.2, 113.1] | 0.017                   | -81.0 | [-85.4, -76.6] | 0.029            | 155.0 | [111.8, 198.3] | 0.032                   | 126.1  | [111.6, 140.5] | 1.84 x 10 <sup>-5</sup> | 245.2  | [225.0, 265.4] | 1.59 x 10 <sup>-7</sup> | 327.8  | [308.8, 346.8] | 1.68 x 10 <sup>-7</sup> |
| 2                      | 16 | 106.3     | [102.2, 110.4] | -                       | -78.1 | [-81.7, -74.5] | -                | 146.0 | [110.3, 181.6] | -                       | 105.3  | [91.7, 118.8]  | -                       | 212.3  | [196.5, 228.1] | -                       | 291.4  | [278.4, 304.3] | -                       |
| 3                      | 16 | 103.5     | [98.1, 108.9]  | 7.21 x 10 <sup>-7</sup> | -76.6 | [-79.9, -73.3] | 0.11             | 133.9 | [92.0, 175.8]  | 0.1                     | 83.0   | [74.4, 91.7]   | 1.84 x 10 <sup>-5</sup> | 166.3  | [155.9, 176.6] | 3.00 x 10 <sup>-5</sup> | 240.2  | [231.2, 249.3] | 1.85 x 10 <sup>-5</sup> |
| <b>TOF</b>             |    |           |                |                         |       |                |                  |       |                |                         |        |                |                         |        |                |                         |        |                |                         |
| 1                      | 17 | 107.9     | [103.7, 112.1] | 0.82                    | -81.3 | [-85.3, -77.3] | 0.81             | 133.9 | [113.7, 154.2] | 0.46                    | 135.2  | [118.1, 152.3] | 4.38 x 10 <sup>-7</sup> | 264.5  | [203.5, 298.5] | 2.23 x 10 <sup>-5</sup> | 360.1  | [320.6, 399.6] | 2.35 x 10 <sup>-5</sup> |
| 2                      | 17 | 107.4     | [102.4, 112.5] | -                       | -80.0 | [-84.4, -75.7] | -                | 126.1 | [102.7, 149.4] | -                       | 119.6  | [103.2, 135.9] | -                       | 231.0  | [203.0, 259.0] | -                       | 319.0  | [287.9, 350.0] | -                       |
| 3                      | 13 | 101.1     | [94.5, 107.6]  | 4.21 x 10 <sup>-5</sup> | -75.8 | [-81.4, -70.1] | 0.15             | 112.6 | [90.7, 134.5]  | 1.72 x 10 <sup>-5</sup> | 93.9   | [82.3, 105.5]  | 3.59 x 10 <sup>-5</sup> | 181.9  | [163.0, 200.6] | 5.75 x 10 <sup>-7</sup> | 265.6  | [241.0, 290.3] | 1.82 x 10 <sup>-5</sup> |
| <b>iPS-CBs, 9 wks</b>  |    |           |                |                         |       |                |                  |       |                |                         |        |                |                         |        |                |                         |        |                |                         |
| 1                      | 9  | 106.0     | [102.1, 109.8] | 0.1                     | -75.1 | [-78.3, -72.0] | 0.42             | 90.6  | [55.4, 124.8]  | 0.67                    | 75.0   | [70.0, 80.0]   | 0.38                    | 138.6  | [130.1, 147.2] | 8.25 x 10 <sup>-5</sup> | 189.6  | [176.7, 202.5] | 0.077                   |
| 2                      | 17 | 106.0     | [103.1, 108.9] | -                       | -73.8 | [-76.4, -71.2] | -                | 88.9  | [65.2, 112.7]  | -                       | 68.8   | [64.8, 72.8]   | -                       | 123.9  | [118.9, 129.0] | -                       | 176.1  | [167.8, 184.5] | -                       |
| 3                      | 12 | 104.6     | [100.7, 108.4] | 0.019                   | -73.9 | [-77.7, -70.1] | 0.96             | 80.0  | [54.6, 105.3]  | 0.22                    | 63.9   | [59.7, 68.1]   | 0.086                   | 117.6  | [112.3, 123.0] | 9.18 x 10 <sup>-5</sup> | 170.1  | [161.3, 179.0] | 0.07                    |
| <b>iPS-CBs, 16 wks</b> |    |           |                |                         |       |                |                  |       |                |                         |        |                |                         |        |                |                         |        |                |                         |
| 1                      | 4  | 96.0      | [86.7, 105.4]  | 0.29                    | -62.1 | [-69.1, -55.1] | 0.64             | n.a.  | n.a.           | n.a.                    | 62.4   | [55.2, 69.6]   | 0.26                    | 116.5  | [99.2, 133.8]  | 0.36                    | 173.5  | [142.5, 204.6] | 0.33                    |
| 2                      | 10 | 94.0      | [89.9, 98.2]   | -                       | -62.3 | [-67.1, -57.5] | -                | 45.7  | [n=2]          | -                       | 53.8   | [49.2, 58.4]   | -                       | 101.3  | [93.7, 109.0]  | -                       | 149.0  | [138.8, 159.3] | -                       |
| 3                      | 5  | 95.5      | [88.3, 102.7]  | 0.26                    | -61.9 | [-71.7, -52.1] | 0.037            | 46.5  | [21.4, 71.6]   | n.a.                    | 51.6   | [46.2, 57.0]   | 0.15                    | 94.2   | [85.2, 103.3]  | 0.22                    | 139.4  | [129.1, 149.8] | 0.19                    |

RM, ANOVA repeated measures & LSD Post-Hoc testing

FA, Friedman ANOVA & Wilcoxon pairwise testing

1, p-values are computed for RM/FA and individual groups compared to 2Hz

n.a. indicates missing data/lack of post-hoc testing

**Supplemental Table 2: Effects of  $I_{K,r}$  blockade.**

|                        | n | amplitude                                       | MDP                                             | Vmax                                            | APD 50                                          | APD 90                                          | EAD                     |
|------------------------|---|-------------------------------------------------|-------------------------------------------------|-------------------------------------------------|-------------------------------------------------|-------------------------------------------------|-------------------------|
|                        |   | mean<br>95% CI<br>p-value<br>vs. BL<br>(*E4031) | mean<br>95% CI<br>p-value<br>vs. BL<br>(*E4031) | mean<br>95% CI<br>p-value<br>vs. BL<br>(*E4031) | mean<br>95% CI<br>p-value<br>vs. BL<br>(*E4031) | mean<br>95% CI<br>p-value<br>vs. BL<br>(*E4031) |                         |
|                        |   | mV<br>mV<br>ms                                  | ms<br>ms<br>ms                                  | mV/s<br>mV/s<br>mV/s                            | ms<br>ms<br>ms                                  | ms<br>ms<br>ms                                  |                         |
| <b>HLHS</b>            |   |                                                 |                                                 |                                                 |                                                 |                                                 |                         |
| Baseline               | 3 | 109.1 [78.5, 139.6]                             | -80.0 [-96.8, -63.1]                            | 149.4 [-74.4, 373.1]                            | 225.2 [197.1, 253.3]                            | 302.8 [279.8, 325.8]                            | -                       |
| E4031 1µM              | 3 | 114.9 [111.7, 118.0]                            | -85.1 [-97.1, -73.0]                            | 192.3 [88.29, 296.2]                            | 352.4 [252.1, 452.6]                            | 489.9 [342.2, 637.6]                            | 0.032                   |
|                        |   | 0.52                                            | 0.75                                            | 0.33                                            | 0.047                                           |                                                 |                         |
| <b>Fallot</b>          |   |                                                 |                                                 |                                                 |                                                 |                                                 |                         |
| Baseline               | 6 | 108.9 [104.4, 113.4]                            | -76.5 [-85.9, -66.5]                            | 120.2 [92.2, 148.1]                             | 263.5 [182.2, 344.9]                            | 327.4 [244.1, 410.7]                            | -                       |
| E4031 1µM              | 6 | 101.9 [91.9, 112.0]                             | -71.6 [-82.7, -60.6]                            | 97.7 [85.6, 109.7]                              | 345.0 [259.9, 430.1]                            | 477.6 [365.6, 589.6]                            | 5.53 x 10 <sup>-4</sup> |
|                        |   | 0.11                                            | 0.23                                            | 0.037                                           | 1.31 x 10 <sup>-3</sup>                         |                                                 |                         |
| <b>IPS-CBs, 9 wks</b>  |   |                                                 |                                                 |                                                 |                                                 |                                                 |                         |
| Baseline               | 7 | 106.2 [102.1, 110.3]                            | -78.1 [-82.5, -73.7]                            | 96.5 [48.5, 144.5]                              | 124.2 [114.4, 134.0]                            | 176.7 [156.1, 197.3]                            | -                       |
| E4031 1µM              | 7 | 106.3 [100.1, 112.5]                            | -74.6 [-77.6, -71.7]                            | 68.2 [33.3, 103.1]                              | 146.1 [133.9, 158.2]                            | 248.5 [225.2, 271.8]                            | 3.51 x 10 <sup>-3</sup> |
|                        |   | 0.97                                            | 0.28                                            | 0.21                                            | 6.46 x 10 <sup>-3</sup>                         |                                                 |                         |
| <b>Fallot</b>          |   |                                                 |                                                 |                                                 |                                                 |                                                 |                         |
| Baseline               | 7 | 104.4 [98.7, 110.7]                             | -75.1 [-78.6, -71.52]                           | 128.1 [95.1, 161.0]                             | 220.6 [193.2, 247.9]                            | 335.8 [308.4, 363.3]                            | -                       |
| E4031 0.1µM            | 7 | 100.9 [91.4, 110.3]                             | -74.1 [-78.3, -69.9]                            | 78.7 [62.7, 94.7]                               | 293.7 [252.9, 334.5]                            | 511.9 [442.7, 581.0]                            | 2.15 x 10 <sup>-1</sup> |
| +isoproterenol         | 5 | 110.1 [104.5, 115.8]                            | -81.0 [-85.9, -76.2]                            | 56.2 [n.a.]                                     | 270.0 [190.3, 349.7]                            | 463.4 [291.4, 635.4]                            | 0.38*                   |
|                        |   | 0.23*                                           | 6.56 x 10 <sup>-3*</sup>                        | n.a.                                            | 0.27*                                           |                                                 |                         |
| <b>IPS-CBs, 9 wks</b>  |   |                                                 |                                                 |                                                 |                                                 |                                                 |                         |
| Baseline               | 8 | 105.5 [98.7, 112.3]                             | -74.2 [-77.2, -71.1]                            | 86.5 [47.4, 125.7]                              | 122.1 [115.3, 128.8]                            | 168.5 [162.5, 174.5]                            | -                       |
| E4031 0.1µM            | 8 | 110.8 [106.8, 114.7]                            | -73.4 [-97.5, -49.2]                            | 98.2 [75.2, 121.3]                              | 130.0 [121.9, 138.1]                            | 213.0 [195.3, 230.7]                            | 3.14 x 10 <sup>-1</sup> |
| +isoproterenol         | 7 | 110.7 [106.3, 115.1]                            | -75.5 [-86.2, -64.8]                            | 87.6 [70.3, 104.9]                              | 111.3 [80.2, 142.5]                             | 191.8 [152.5, 231.0]                            | 0.40*                   |
|                        |   | 0.26*                                           | 0.97*                                           | 0.49*                                           | 0.18*                                           |                                                 |                         |
| <b>IPS-CBs, 16 wks</b> |   |                                                 |                                                 |                                                 |                                                 |                                                 |                         |
| Baseline               | 6 | 95.3 [86.7, 103.9]                              | -70.4 [-75.2, -65.6]                            | 18.0 [3.1, 33.0]                                | 106.2 [84.5, 127.9]                             | 148.1 [117.8, 178.3]                            | -                       |
| E4031 0.1µM            | 5 | 97.0 [89.6, 104.4]                              | -67.2 [-92.1, -42.3]                            | 14.4 [11.9, 16.9]                               | 133.3 [115.4, 151.2]                            | 239.0 [219.5, 258.6]                            | 0.048                   |
| +isoproterenol         | 4 | 91.9 [84.8, 98.9]                               | -60.2 [-80.3, -40.2]                            | 16.6 [9.9, 23.4]                                | 101.0 [64.2, 137.7]                             | 181.7 [126.3, 237.1]                            | 0.042*                  |
|                        |   | 0.83*                                           | 0.43*                                           | 0.45*                                           | 0.17*                                           |                                                 |                         |

BL, baseline

RM, ANOVA repeated measures & LSD Post-Hoc testing

FA, Friedman ANOVA & Wilcoxon pairwise testing



1, p-values are computed for RM/FA and individual groups compared to baseline or E4031  
(\* )

n.a. indicates missing data/lack of post-hoc testing

**Supplemental Table 3: Force Frequency Relationship (FFR).**

|                         |     | time to peak |            |                       | time to 50% relaxation |                            |                       | time to 90% relaxation |            |                       |                        |
|-------------------------|-----|--------------|------------|-----------------------|------------------------|----------------------------|-----------------------|------------------------|------------|-----------------------|------------------------|
|                         | Hz  | n            | mean       | 95% CI                | p-value <sup>1</sup>   | mean                       | 95% CI                | p-value <sup>1</sup>   | mean       | 95% CI                | p-value <sup>1</sup>   |
|                         |     |              | ms         | ms                    | vs. 2 Hz               | ms                         | ms                    | vs. 2 Hz               | ms         | ms                    | vs. 2 Hz               |
| <b>HLHS</b>             | 0.5 | 9            | 226.7      | [205, 248]            | $3.91 \times 10^{-3}$  | 348.2                      | [323, 374]            | $3.91 \times 10^{-3}$  | 475.2      | [433, 518]            | $3.49 \times 10^{-3}$  |
|                         | 1   | 10           | 208.7      | [191, 227]            | $3.91 \times 10^{-3}$  | 310.4                      | [285, 336]            | $3.91 \times 10^{-3}$  | 436.7      | [400, 474]            | $9.63 \times 10^{-4}$  |
|                         | 1.5 | 10           | 196.5      | [184, 209]            | $1.95 \times 10^{-3}$  | 299.4                      | [260, 291]            | $1.95 \times 10^{-3}$  | 417.9      | [391, 445]            | $1.60 \times 10^{-4}$  |
|                         | 2   | 10           | 182.2      | [172, 193]            | -                      | 275.3                      | [260, 291]            | -                      | 377.8      | [359, 397]            | -                      |
|                         | 1.5 | 10           | 162.8      | [153, 173]            | $1.95 \times 10^{-3}$  | 241.6                      | [228, 255]            | $1.95 \times 10^{-3}$  | 317.7      | [303, 333]            | $3.49 \times 10^{-3}$  |
|                         | 3   | 10           | 166.9      | [154, 180]            | $1.95 \times 10^{-3}$  | 249.1                      | [231, 268]            | $1.95 \times 10^{-3}$  | 330.1      | [309, 351]            | $1.25 \times 10^{-3}$  |
|                         | 4   | 10           | 143.0      | [133, 153]            | $1.95 \times 10^{-3}$  | 208.1                      | [197, 220]            | $1.95 \times 10^{-3}$  | 260.3      | [252, 268]            | $9.81 \times 10^{-8}$  |
|                         |     |              |            |                       |                        | RM: $7.61 \times 10^{-13}$ |                       |                        |            |                       |                        |
|                         |     |              |            |                       |                        | FA: $1.67 \times 10^{-23}$ |                       |                        |            |                       |                        |
|                         |     |              |            |                       |                        | RM: $9.90 \times 10^{-11}$ |                       |                        |            |                       |                        |
| <b>TOF</b>              | 0.5 | 19           | 259.3      | [245, 274]            | $2.68 \times 10^{-10}$ | 401.1                      | [387, 415]            | $2.48 \times 10^{-17}$ | 552.4      | [539, 566]            | $7.41 \times 10^{-15}$ |
|                         | 1   | 19           | 240.1      | [230, 251]            | $2.25 \times 10^{-10}$ | 368.1                      | [357, 379]            | $1.29 \times 10^{-11}$ | 514.2      | [502, 527]            | $2.43 \times 10^{-14}$ |
|                         | 1.5 | 19           | 224.2      | [216, 232]            | $5.78 \times 10^{-11}$ | 345.1                      | [336, 354]            | $2.21 \times 10^{-11}$ | 482.3      | [471, 494]            | $6.64 \times 10^{-14}$ |
|                         | 2   | 19           | 204.5      | [197, 212]            | -                      | 314.6                      | [307, 323]            | -                      | 423.7      | [415, 433]            | -                      |
|                         | 1.5 | 19           | 186.9      | [181, 193]            | $5.33 \times 10^{-8}$  | 286.2                      | [279, 293]            | $5.48 \times 10^{-11}$ | 374.4      | [368, 381]            | $1.46 \times 10^{-15}$ |
|                         | 3   | 19           | 172.8      | [167, 179]            | $5.55 \times 10^{-10}$ | 261.7                      | [255, 268]            | $2.82 \times 10^{-15}$ | 331.5      | [326, 337]            | $1.31 \times 10^{-16}$ |
|                         | 4   | 17           | 153.7      | [148, 159]            | $5.27 \times 10^{-11}$ | 224.1                      | [218, 231]            | $9.72 \times 10^{-15}$ | 271.5      | [267, 276]            | $1.03 \times 10^{-18}$ |
|                         |     |              |            |                       |                        | RM: $4.72 \times 10^{-22}$ |                       |                        |            |                       |                        |
|                         |     |              |            |                       |                        | FA: $1.67 \times 10^{-23}$ |                       |                        |            |                       |                        |
|                         |     |              |            |                       |                        | RM: $1.09 \times 10^{-30}$ |                       |                        |            |                       |                        |
| <b>hiPS-CBs, 9 wks</b>  | 0.5 | 2            | n.a.       | n.a.                  | 0.090                  | n.a.                       | n.a.                  | $2.61 \times 10^{-5}$  | n.a.       | n.a.                  | $2.56 \times 10^{-3}$  |
|                         | 1   | 6            | 143.8      | [130, 158]            | 0.16                   | 228.2                      | [209, 248]            | 0.031                  | 300.3      | [273, 327]            | 1.0                    |
|                         | 1.5 | 8            | 147.0      | [138, 156]            | 0.27                   | 227.0                      | [215, 239]            | 0.079                  | 289.4      | [274, 304]            | 0.045                  |
|                         | 2   | 12           | 140.6      | [135, 146]            | -                      | 218.3                      | [210, 227]            | -                      | 280.2      | [267, 293]            | -                      |
|                         | 1.5 | 12           | 137.3      | [132, 143]            | 0.13                   | 209.3                      | [201, 217]            | 0.17                   | 266.7      | [255, 278]            | 0.80                   |
|                         | 3   | 12           | 140.6      | [132, 149]            | 0.5                    | 212.8                      | [205, 221]            | 0.23                   | 272.8      | [263, 283]            | 0.50                   |
|                         | 4   | 11           | 136.1      | [131, 141]            | 0.5                    | 199.0                      | [191, 207]            | 0.084                  | 249.5      | [239, 260]            | 0.028                  |
|                         |     |              |            |                       |                        | RM: $1.83 \times 10^{-3}$  |                       |                        |            |                       |                        |
|                         |     |              |            |                       |                        | FA: $1.67 \times 10^{-23}$ |                       |                        |            |                       |                        |
|                         |     |              |            |                       |                        | RM: $2.56 \times 10^{-3}$  |                       |                        |            |                       |                        |
| <b>hiPS-CBs, 16 wks</b> | 0.5 | 0            | n.a.       | n.a.                  | n.a.                   | n.a.                       | n.a.                  | $2.954 \times 10^{-4}$ | n.a.       | n.a.                  | $6.84 \times 10^{-08}$ |
|                         | 1   | 0            | n.a.       | n.a.                  | n.a.                   | n.a.                       | n.a.                  | n.a.                   | n.a.       | n.a.                  | n.a.                   |
|                         | 1.5 | 0            | n.a.       | n.a.                  | n.a.                   | n.a.                       | n.a.                  | n.a.                   | n.a.       | n.a.                  | n.a.                   |
|                         | 2   | 5            | 142.6      | [134, 151]            | -                      | 218.6                      | [206, 231]            | -                      | 270.6      | [258, 284]            | -                      |
|                         | 1.5 | 5            | 136.8      | [130, 144]            | 0.040                  | 206.0                      | [196, 216]            | $4.55 \times 10^{-3}$  | 253.0      | [241, 265]            | $2.77 \times 10^{-3}$  |
|                         | 3   | 5            | 139.6      | [134, 145]            | $1.92 \times 10^{-3}$  | 211.2                      | [200, 223]            | $3.33 \times 10^{-3}$  | 259.6      | [248, 271]            | $5.73 \times 10^{-3}$  |
| 4                       | 5   | 133.2        | [127, 140] | $7.99 \times 10^{-4}$ | 195.8                  | [187, 205]                 | $5.09 \times 10^{-4}$ | 240.0                  | [231, 249] | $4.41 \times 10^{-4}$ |                        |

RM, ANOVA repeated measures & LSD Post-Hoc testing

FA, Friedman ANOVA & Wilcoxon pairwise testing

1, p-values are computed for RM/FA and individual groups compared to 2Hz

n.a. indicates missing data/lack of post-hoc testing

**Supplemental Table 4: Effect of  $\beta$ -adrenergic stimulation on twitch morphology.**

|                        |                         | Relative force (change to BL) |           |                                                     | time to peak                |                             |                                | time to 50% relaxation       |                             |                                | time to 90% relaxation      |                             |                                |                             |                             |
|------------------------|-------------------------|-------------------------------|-----------|-----------------------------------------------------|-----------------------------|-----------------------------|--------------------------------|------------------------------|-----------------------------|--------------------------------|-----------------------------|-----------------------------|--------------------------------|-----------------------------|-----------------------------|
|                        |                         | mean                          | 95% CI    | p-value <sup>1</sup><br>vs. 10 <sup>-10</sup> mol/L | mean                        | 95% CI                      | p-value <sup>1</sup><br>vs. BL | mean                         | 95% CI                      | p-value <sup>1</sup><br>vs. BL | mean                        | 95% CI                      | p-value <sup>1</sup><br>vs. BL |                             |                             |
|                        |                         | %                             | %         |                                                     | ms                          | ms                          |                                | ms                           | ms                          |                                | ms                          | ms                          |                                |                             |                             |
| <b>HLHS</b>            | mol/L                   | n                             |           |                                                     |                             |                             |                                |                              |                             |                                |                             |                             |                                |                             |                             |
|                        | BL                      | 6                             | 0         | [0, 0]                                              | RM: 5.24 x 10 <sup>-5</sup> | 185                         | [165, 205]                     | RM: 7.37 x 10 <sup>-10</sup> | 278                         | [246, 309]                     | FA: 1.95 x 10 <sup>-8</sup> | 374                         | [341, 407]                     | FA: 2.55 x 10 <sup>-8</sup> |                             |
|                        | 10 <sup>-10</sup>       | 5                             | -9        | [-17, -1]                                           | -                           | 185                         | [160, 210]                     | 0.32                         | 280                         | [239, 320]                     | -                           | 180                         | [331, 420]                     | 0.81                        |                             |
|                        | 10 <sup>-9</sup>        | 6                             | -12       | [-24, -1]                                           | 0.44                        | 180                         | [163, 197]                     | 0.069                        | 273                         | [247, 300]                     | 0.14                        | 372                         | [343, 401]                     | 0.53                        |                             |
|                        | 10 <sup>-8</sup>        | 6                             | -12       | [-131, 107]                                         | 0.34                        | 166                         | [143, 188]                     | 0.049                        | 246                         | [218, 275]                     | 0.028                       | 338                         | [308, 368]                     | 0.031                       |                             |
|                        | 10 <sup>-7</sup>        | 6                             | 159       | [23, 296]                                           | 0.052                       | 151                         | [125, 178]                     | 3.93 x 10 <sup>-3</sup>      | 222                         | [184, 260]                     | 0.028                       | 294                         | [244, 344]                     | 0.031                       |                             |
|                        | 10 <sup>-6</sup>        | 6                             | 403       | [99, 707]                                           | 0.032                       | 149                         | [132, 166]                     | 7.38 x 10 <sup>-4</sup>      | 218                         | [192, 243]                     | 0.027                       | 285                         | [252, 318]                     | 0.031                       |                             |
|                        | 10 <sup>-5</sup>        | 6                             | 478       | [129, 826]                                          | 0.028                       | 150                         | [134, 166]                     | 2.25 x 10 <sup>-3</sup>      | 220                         | [199, 241]                     | 0.028                       | 283                         | [257, 309]                     | 0.031                       |                             |
|                        | <b>TOF</b>              | BL                            | 11        | 0                                                   | [0, 0]                      | FA: 4.46 x 10 <sup>-4</sup> | 201                            | [188, 214]                   | RM: 4.63 x 10 <sup>-3</sup> | 303                            | [286, 320]                  | RM: 2.10 x 10 <sup>-4</sup> | 406                            | [388, 425]                  | RM: 7.09 x 10 <sup>-5</sup> |
|                        |                         | 10 <sup>-10</sup>             | 10        | 5                                                   | [-9, 19]                    | -                           | 199                            | [184, 214]                   | 0.64                        | 299                            | [279, 319]                  | -                           | 402                            | [378, 425]                  | 1.00                        |
| 10 <sup>-9</sup>       |                         | 11                            | 44        | [-26, 113]                                          | 0.63                        | 192                         | [174, 210]                     | 1.00                         | 286                         | [256, 312]                     | 0.30                        | 383                         | [348, 419]                     | 0.17                        |                             |
| 10 <sup>-8</sup>       |                         | 11                            | 122       | [12, 233]                                           | 0.38                        | 176                         | [160, 192]                     | 0.15                         | 264                         | [241, 288]                     | 0.13                        | 356                         | [318, 394]                     | 0.27                        |                             |
| 10 <sup>-7</sup>       |                         | 11                            | 216       | [118, 314]                                          | 3.91 x 10 <sup>-3</sup>     | 164                         | [156, 172]                     | 0.077                        | 247                         | [232, 262]                     | 0.096                       | 328                         | [302, 354]                     | 0.077                       |                             |
| 10 <sup>-6</sup>       |                         | 11                            | 378       | [199, 557]                                          | 1.95 x 10 <sup>-3</sup>     | 155                         | [148, 162]                     | 0.049                        | 231                         | [218, 245]                     | 0.063                       | 307                         | [291, 322]                     | 0.039                       |                             |
| 10 <sup>-5</sup>       |                         | 3                             | 336       | [-401, 1072]                                        | 0.25                        | 154                         | [131, 176]                     | 0.048                        | 230                         | [201, 259]                     | 0.076                       | 312                         | [284, 341]                     | 0.061                       |                             |
| <b>hiPS-CBs, 9 wks</b> |                         | BL                            | 5         | 0                                                   | [0, 0]                      | FA: 9.03 x 10 <sup>-4</sup> | 141                            | [127, 155]                   | RM: 3.68 x 10 <sup>-8</sup> | 223                            | [194, 251]                  | RM: 2.09 x 10 <sup>-6</sup> | 288                            | [245, 331]                  | RM: 7.38 x 10 <sup>-6</sup> |
|                        |                         | 10 <sup>-10</sup>             | 5         | -1                                                  | [-8, 7]                     | -                           | 139                            | [125, 153]                   | 0.16                        | 223                            | [199, 247]                  | 0.93                        | 292                            | [253, 330]                  | 0.57                        |
|                        |                         | 10 <sup>-9</sup>              | 5         | -2                                                  | [-13, 9]                    | 0.63                        | 140                            | [125, 156]                   | 0.21                        | 221                            | [197, 246]                  | 0.35                        | 286                            | [250, 322]                  | 0.50                        |
|                        | 10 <sup>-8</sup>        | 5                             | -7        | [-19, 6]                                            | 0.13                        | 139                         | [124, 154]                     | 0.12                         | 221                         | [195, 247]                     | 0.12                        | 285                         | [248, 322]                     | 0.29                        |                             |
|                        | 10 <sup>-7</sup>        | 5                             | -15       | [-22, -9]                                           | 0.063                       | 136                         | [123, 150]                     | 0.013                        | 217                         | [194, 240]                     | 0.18                        | 281                         | [247, 316]                     | 0.20                        |                             |
|                        | 10 <sup>-6</sup>        | 5                             | -17       | [-27, -6]                                           | 0.063                       | 127                         | [118, 137]                     | 7.09 x 10 <sup>-3</sup>      | 201                         | [187, 216]                     | 0.025                       | 263                         | [237, 289]                     | 0.030                       |                             |
|                        | 10 <sup>-5</sup>        | 5                             | -21       | [-36, -5]                                           | 0.063                       | 124                         | [112, 135]                     | 4.35 x 10 <sup>-3</sup>      | 196                         | [178, 215]                     | 0.030                       | 255                         | [231, 280]                     | 0.038                       |                             |
|                        | <b>hiPS-CBs, 16 wks</b> | BL                            | 5         | 0                                                   | [0, 0]                      | RM: 0.49                    | 134                            | [130, 138]                   | FA: 6.29 x 10 <sup>-3</sup> | 200                            | [192, 208]                  | RM: 1.64 x 10 <sup>-4</sup> | 248                            | [240, 257]                  | RM: 2.15 x 10 <sup>-4</sup> |
|                        |                         | 10 <sup>-10</sup>             | 5         | -2                                                  | [-4, -1]                    | -                           | 134                            | [131, 194]                   | 1.0                         | 201                            | [194, 207]                  | -                           | 249                            | [242, 255]                  | -                           |
|                        |                         | 10 <sup>-9</sup>              | 5         | -4                                                  | [-6, -2]                    | n.a.                        | 134                            | [131, 136]                   | 1.0                         | 199                            | [193, 206]                  | 0.76                        | 247                            | [240, 255]                  | 0.90                        |
| 10 <sup>-8</sup>       |                         | 5                             | -4        | [-7, -1]                                            | n.a.                        | 132                         | [124, 139]                     | 0.75                         | 197                         | [185, 209]                     | 0.56                        | 244                         | [229, 260]                     | 0.58                        |                             |
| 10 <sup>-7</sup>       |                         | 5                             | -3        | [-11, 4]                                            | n.a.                        | 129                         | [119, 139]                     | 0.5                          | 192                         | [178, 207]                     | 0.32                        | 240                         | [223, 257]                     | 0.33                        |                             |
| 10 <sup>-6</sup>       |                         | 5                             | 1         | [-13, 14]                                           | n.a.                        | 122                         | [112, 132]                     | 0.13                         | 183                         | [169, 197]                     | 0.035                       | 229                         | [213, 245]                     | 0.032                       |                             |
| 10 <sup>-5</sup>       | 5                       | 2                             | [-14, 17] | n.a.                                                | 120                         | [110, 129]                  | 0.063                          | 181                          | [168, 194]                  | 0.026                          | 227                         | [213, 242]                  | 0.025                          |                             |                             |

BL, baseline

RM, ANOVA repeated measures & LSD Post-Hoc testing

FA, Friedman ANOVA & Wilcoxon pairwise testing

1, p-values are computed for RM/FA and individual groups compared to baseline

n.a. indicates missing data/lack of post-hoc testing
